# Supplementary material
Source: MDPI journal article supplement (https://www.mdpi.com/2071-1050/14/22/14973)
Supplement: s1 [file s1]

**Table S1.** Species composition in Taizi River.

| Scientific names                                               | Total  |        | G1     |        | G2     |        |
|----------------------------------------------------------------|--------|--------|--------|--------|--------|--------|
|                                                                | Ni (%) | Fi (%) | Ni (%) | Fi (%) | Ni (%) | Fi (%) |
| <b>PETROMYZONTIFORMES</b>                                      |        |        |        |        |        |        |
| Petromyzontidae                                                |        |        |        |        |        |        |
| 1. <i>Lampetra reissneri</i> (Dybowski, 1896)                  | 0.04   | 9.09   | 0.08   | 21.43  | --     | --     |
| <b>CYPRINIFORMES</b>                                           |        |        |        |        |        |        |
| Cyprinidae                                                     |        |        |        |        |        |        |
| 2. <i>Zacco platypus</i> (Temminck & Schlegel, 1846)           | 13.74  | 81.82  | 13.34  | 100    | 14.26  | 68.42  |
| 3. <i>Opsariichthys bidens</i> (Günther, 1873)                 | 0.04   | 9.09   | --     | --     | 0.08   | 15.79  |
| 4. <i>Aphyocypris chinensis</i> (Günther, 1868)                | 0.66   | 39.39  | 0.72   | 35.71  | 0.56   | 42.10  |
| 5. <i>Phoxinus lagowskii</i> (Dybowski, 1869)                  | 28.95  | 63.64  | 51.32  | 100    | 0.70   | 36.84  |
| 6. <i>Hemiculter leucisculus</i> (Basilewsky, 1855)            | 4.63   | 36.36  | 0.09   | 7.14   | 10.37  | 57.90  |
| 7. <i>Hemiculter bleekeri</i> (Warpachowski, 1888)             | 0.01   | 3.03   | --     | --     | 0.02   | 5.26   |
| 8. <i>Cultrichthys compressocarpus</i> (Yih & Chu, 1959)       | 0.01   | 3.03   | --     | --     | 0.03   | 5.26   |
| 9. <i>Acheilognathus macropterus</i> (Bleeker, 1871)           | 2.31   | 39.39  | 0.81   | 7.14   | 4.21   | 63.16  |
| 10. <i>Paracheilognathus imberbis</i> (Günther, 1868)          | 0.63   | 15.15  | --     | --     | 1.43   | 26.32  |
| 11. <i>Rhodeus lighti</i> (Wu, 1931)                           | 0.07   | 12.12  | 0.02   | 7.14   | 0.14   | 15.79  |
| 12. <i>Rhodeus ocellatus</i> (Kner, 1866)                      | 4.58   | 51.52  | 0.26   | 28.57  | 10.04  | 68.42  |
| 13. <i>Rhodeus fangi</i> (Miao, 1934)                          | 0.61   | 24.24  | --     | --     | 1.37   | 42.11  |
| 14. <i>Hemibarbus labeo</i> (Pallas, 1776)                     | 0.03   | 3.03   | 0.06   | 7.14   | --     | --     |
| 15. <i>Pseudorasbora parva</i> (Temminck & Schlegel, 1846)     | 7.85   | 84.85  | 2.06   | 71.43  | 15.17  | 94.74  |
| 16. <i>Sarcocheilichthys nigripinnis</i> (Günther, 1873)       | 0.06   | 6.06   | 0.11   | 14.29  | --     | --     |
| 17. <i>Gobio cynocephalus</i> (Dybowski, 1869)                 | 0.03   | 9.09   | 0.02   | 7.14   | 0.04   | 10.53  |
| 18. <i>Gobio tenuicarpus</i> (Mori, 1934)                      | 0.02   | 6.06   | --     | --     | 0.05   | 10.53  |
| 19. <i>Gobio rivuloides</i> (Nichols, 1925)                    | 0.01   | 3.03   | 0.02   | 7.14   | --     | --     |
| 20. <i>Squalidus argentatus</i> (Sauvage & Dabry de Thiersant, | 0.47   | 15.15  | 0.84   | 35.71  | --     | --     |

|                           |                                                                      |      |       |      |       |       |        |
|---------------------------|----------------------------------------------------------------------|------|-------|------|-------|-------|--------|
|                           | 1874)                                                                |      |       |      |       |       |        |
|                           | 21. <i>Squalidus chankaensis</i> (Dybowski, 1872)                    | 0.37 | 24.24 | 0.59 | 35.71 | 0.08  | 15.79  |
|                           | 22. <i>Squalidus wolterstorffi</i> (Regan, 1908)                     | 0.37 | 6.06  | --   | --    | 0.83  | 10.53  |
|                           | 23. <i>Huigobio chinssuensis</i> (Nichols, 1926)                     | 3.01 | 54.55 | 4.31 | 92.86 | 1.37  | 26.32  |
|                           | 24. <i>Abbottina rivularis</i> (Basilewsky, 1855)                    | 0.33 | 45.46 | 0.13 | 28.57 | 0.59  | 57.90  |
|                           | 25. <i>Abbottina liaoningensis</i> (Qin, 1987)                       | 0.01 | 3.03  | --   | --    | 0.03  | 5.23   |
|                           | 26. <i>Cyprinus carpio</i> (Linnaeus, 1758)                          | 0.18 | 9.09  | --   | --    | 0.40  | 15.79  |
|                           | 27. <i>Cyprinus carpio</i> var. <i>specularis</i> (Linnaeus, 1758)   | 0.02 | 6.06  | 0.02 | 7.14  | 0.03  | 5.26   |
|                           | 28. <i>Carassius auratus</i> (Linnaeus, 1758)                        | 9.19 | 96.97 | 2.52 | 92.86 | 17.62 | 100.00 |
| Cobitidae                 |                                                                      |      |       |      |       |       |        |
|                           | 29. <i>Barbatula nuda</i> (Bleeker, 1864)                            | 1.24 | 48.49 | 2.16 | 92.86 | 0.07  | 15.79  |
|                           | 30. <i>Lefua costata</i> (Kessler, 1876)                             | 0.04 | 12.12 | 0.03 | 14.29 | 0.06  | 10.53  |
|                           | 31. <i>Cobitis sibirica</i> (Gladkov, 1935)                          | 2.27 | 51.52 | 3.90 | 92.86 | 0.20  | 21.05  |
|                           | 32. <i>Misgurnus anguillicaudatus</i> (Cantor, 1842)                 | 1.95 | 72.73 | 2.11 | 71.43 | 1.76  | 73.68  |
|                           | 33. <i>Misgurnus bipartitus</i> (Sauvage & Dabry de Thiersant, 1874) | 0.71 | 12.12 | 0.06 | 14.29 | 1.53  | 10.53  |
|                           | 34. <i>Misgurnus mohoity</i> (Cantor, 1842)                          | 0.05 | 12.12 | 0.07 | 21.43 | 0.03  | 5.26   |
|                           | 35. <i>Paramisgurnus dabryanus</i> (Dabry de Thiersant, 1872)        | 0.68 | 39.39 | 0.08 | 21.43 | 1.44  | 52.63  |
| <b>SILURIFORMES</b>       |                                                                      |      |       |      |       |       |        |
| Bagridae                  |                                                                      |      |       |      |       |       |        |
|                           | 36. <i>Pelteobagrus fulvidraco</i> (Richardson, 1846)                | 0.02 | 6.06  | 0.01 | 7.14  | 0.03  | 5.26   |
|                           | 37. <i>Pseudobagrus ussuriensis</i> (Dybowski, 1872)                 | 0.01 | 3.03  | --   | --    | 0.02  | 5.26   |
| Siluridae                 |                                                                      |      |       |      |       |       |        |
|                           | 38. <i>Silurus asotus</i> (Linnaeus, 1758)                           | 0.16 | 27.27 | 0.11 | 21.43 | 0.23  | 31.58  |
| <b>OSMERIFORMES</b>       |                                                                      |      |       |      |       |       |        |
| Osmeridae                 |                                                                      |      |       |      |       |       |        |
|                           | 39. <i>Hypomesus olidus</i> (Pallas, 1814)                           | 0.01 | 3.03  | 0.02 | 7.14  | --    | --     |
| <b>CYPRINODONTIFORMES</b> |                                                                      |      |       |      |       |       |        |

|                          |                                                             |      |       |      |       |      |       |
|--------------------------|-------------------------------------------------------------|------|-------|------|-------|------|-------|
| Adrianichthyida          |                                                             |      |       |      |       |      |       |
|                          | 40. <i>Oryzias latipes</i> (Temminck & Schlegel, 1846)      | 3.70 | 51.52 | 0.06 | 7.14  | 8.3  | 84.21 |
| <b>GASTEROSTEIFORMES</b> |                                                             |      |       |      |       |      |       |
| Gasterosteidae           |                                                             |      |       |      |       |      |       |
|                          | 41. <i>Pungitius sinensis</i> (Guichenot, 1869)             | 2.45 | 27.27 | 4.34 | 57.14 | 0.07 | 5.26  |
| <b>PERCIFORMES</b>       |                                                             |      |       |      |       |      |       |
| Mugilidae                |                                                             |      |       |      |       |      |       |
|                          | 42. <i>Mugil cephalus</i> (Linnaeus, 1758)                  | 0.02 | 3.03  | --   | --    | 0.05 | 5.26  |
| Odontobutidae            |                                                             |      |       |      |       |      |       |
|                          | 43. <i>Odontobutis obscurus</i> (Temminck & Schlegel, 1845) | 1.17 | 33.33 | 2.03 | 71.43 | 0.08 | 5.26  |
|                          | 44. <i>Hypseleotris swinhonis</i> (Günther, 1873)           | 1.25 | 60.61 | 0.10 | 28.57 | 2.71 | 84.21 |
| Gobiidae                 |                                                             |      |       |      |       |      |       |
|                          | 45. <i>Rhinogobius cliffordpopei</i> (Nichols, 1925)        | 3.29 | 48.49 | 5.44 | 64.29 | 0.57 | 36.84 |
|                          | 46. <i>Rhinogobius brunneus</i> (Temminck & Schlegel, 1845) | 0.42 | 42.42 | 0.24 | 35.71 | 0.65 | 47.37 |
|                          | 47. <i>Rhinogobius giurinus</i> (Rutter, 1897)              | 2.11 | 39.39 | 1.91 | 57.14 | 2.36 | 26.32 |
|                          | 48. <i>Chloea laevis</i> (Hilgendorf, 1879)                 | 0.04 | 12.12 | 0.01 | 7.14  | 0.08 | 15.79 |
| Osphronemidae            |                                                             |      |       |      |       |      |       |
|                          | 49. <i>Macropodus ocellatus</i> (Cantor, 1842)              | 0.05 | 9.09  | --   | --    | 0.12 | 15.79 |
| Channidae                |                                                             |      |       |      |       |      |       |
|                          | 50. <i>Channa argus</i> (Cantor, 1842)                      | 0.13 | 21.21 | --   | --    | 0.30 | 36.84 |

**Table S2.** Mean value and standard errors of different environmental factors between the upstream, the midstream and downstream.

|                                        | upstream                  | midstream                 | downstream               |
|----------------------------------------|---------------------------|---------------------------|--------------------------|
| AL (m)                                 | 288.89±89.40 <sup>a</sup> | 129.00±60.46 <sup>b</sup> | 26.11±12.93 <sup>c</sup> |
| WC (cm)                                | 41.94±26.95 <sup>a</sup>  | 48.5±21.77 <sup>a</sup>   | 42.47±6.23 <sup>a</sup>  |
| WD (m)                                 | 0.45±0.32 <sup>a</sup>    | 0.51±0.22 <sup>a</sup>    | 0.89±0.56 <sup>a</sup>   |
| WW (cm)                                | 60.11±39.61 <sup>a</sup>  | 128.2±84.84 <sup>a</sup>  | 94.53±78.17 <sup>a</sup> |
| CV (m/s)                               | 0.40±0.11 <sup>a</sup>    | 0.32±0.27 <sup>ab</sup>   | 0.21±0.18 <sup>b</sup>   |
| WT (°C)                                | 15.32±1.44 <sup>b</sup>   | 16.07±1.70 <sup>ab</sup>  | 17.42±2.01 <sup>a</sup>  |
| DO (mg/L)                              | 10.70±0.76 <sup>ab</sup>  | 11.35±0.97 <sup>a</sup>   | 9.88±1.32 <sup>b</sup>   |
| pH                                     | 8.41±0.25 <sup>a</sup>    | 8.35±0.18 <sup>a</sup>    | 8.30±0.22 <sup>a</sup>   |
| COD <sub>Mn</sub> (mg/L)               | 2.26±0.40 <sup>b</sup>    | 2.00±0.20 <sup>b</sup>    | 4.88±1.76 <sup>a</sup>   |
| TP (mg/L)                              | 0.22±0.31 <sup>a</sup>    | 0.08±0.02 <sup>a</sup>    | 0.33±0.20 <sup>a</sup>   |
| SRP (mg/L)                             | 0.03±0.02 <sup>a</sup>    | 0.02±0.01 <sup>a</sup>    | 0.08±0.09 <sup>a</sup>   |
| TN (mg/L)                              | 2.71±0.47 <sup>b</sup>    | 2.81±0.41 <sup>b</sup>    | 5.46±2.24 <sup>a</sup>   |
| NO <sub>3</sub> <sup>-</sup> -N (mg/L) | 1.06±0.31 <sup>b</sup>    | 1.29±0.27 <sup>b</sup>    | 1.91±0.53 <sup>a</sup>   |
| NH <sub>4</sub> <sup>+</sup> -N (mg/L) | 0.16±0.05 <sup>a</sup>    | 0.25±0.13 <sup>a</sup>    | 0.97±1.06 <sup>a</sup>   |
| NO <sub>2</sub> <sup>-</sup> -N (mg/L) | 0.003±0.004 <sup>b</sup>  | 0.007±0.01 <sup>b</sup>   | 0.14±0.11 <sup>a</sup>   |
| CL (%)                                 | 0.19±0.06 <sup>b</sup>    | 0.27±0.10 <sup>b</sup>    | 0.61±0.23 <sup>a</sup>   |
| For (%)                                | 0.72±0.10 <sup>a</sup>    | 0.54±0.20 <sup>a</sup>    | 0.10±0.15 <sup>b</sup>   |
| Gra (%)                                | 0.05±0.03 <sup>a</sup>    | 0.12±0.11 <sup>a</sup>    | 0.06±0.07 <sup>a</sup>   |
| UL (%)                                 | 0.04±0.04 <sup>b</sup>    | 0.07±0.03 <sup>b</sup>    | 0.24±0.13 <sup>a</sup>   |

<sup>a</sup>, <sup>b</sup>, and <sup>c</sup> were used to distinguish differences among different groups.
